# Supplementary material for: PEGylated dihydromyricetin-loaded nanoliposomes coated with tea saponin inhibit bacterial oxidative respiration and energy metabolism
Source: Royal Society of Chemistry journal article supplement (doi:10.1039/d1fo01943k), 2021-01-01
Supplement: d1fo01943k1.pdf [file d1fo01943k1.pdf]

**PEGylated Dihydromyricetin-loaded nanoliposomes coated tea saponin synthesis  
inhibit bacterial oxidative respiration and energy metabolism**

Fan Luo<sup>a</sup>, Dandan Zeng<sup>a</sup>, Renxiang Chen<sup>a</sup>, Ayesha Zafar<sup>d,e</sup>, LingWeng<sup>a</sup>, Wenxiong Wang<sup>b</sup>, Yubo  
Tian<sup>a,c</sup>, Murtaza Hasan<sup>\*a,e</sup> and Xugang Shu<sup>\*a,c</sup>

- 
- <sup>a</sup> School of Chemistry and Chemical Engineering, Zhongkai University of Agriculture and Engineering, Guangzhou, 510225, P.R. China.
- <sup>b</sup> School of Energy and Environment and State Key Laboratory of Marine Pollution, City University of Hong Kong, Kowloon, 999077, Hong Kong, China
- <sup>c</sup> Guangdong Province Key Laboratory of Waterfowl Healthy Breeding, Guangzhou 510225, China.
- <sup>d</sup> Department of Biomedical Engineering, College of Future Technology, Peking University, Beijing, 100871, China.
- <sup>e</sup> Department of Biotechnology, The Institute of Biochemistry, Biotechnology and Bioinformatics, The Islamia University of Bahawalpur, 63100, Pakistan

**AUTHOR INFORMATION**

**Corresponding author:**

**Dr Murtaza Hasan & Professor Xugang Shu**

**Email:** [murtaza@zhku.edu.pk](mailto:murtaza@zhku.edu.pk) & [xgshu@21cn.com](mailto:xgshu@21cn.com)

Phone: 86-020-8900-3114.

Fax: 86-020-8900-3114.

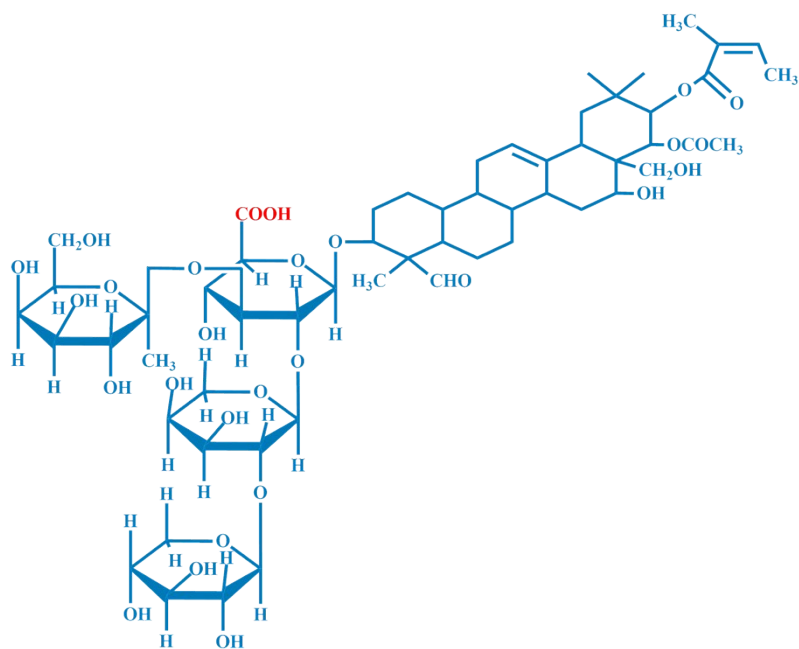

**Fig. S1.** Molecular structure of TS

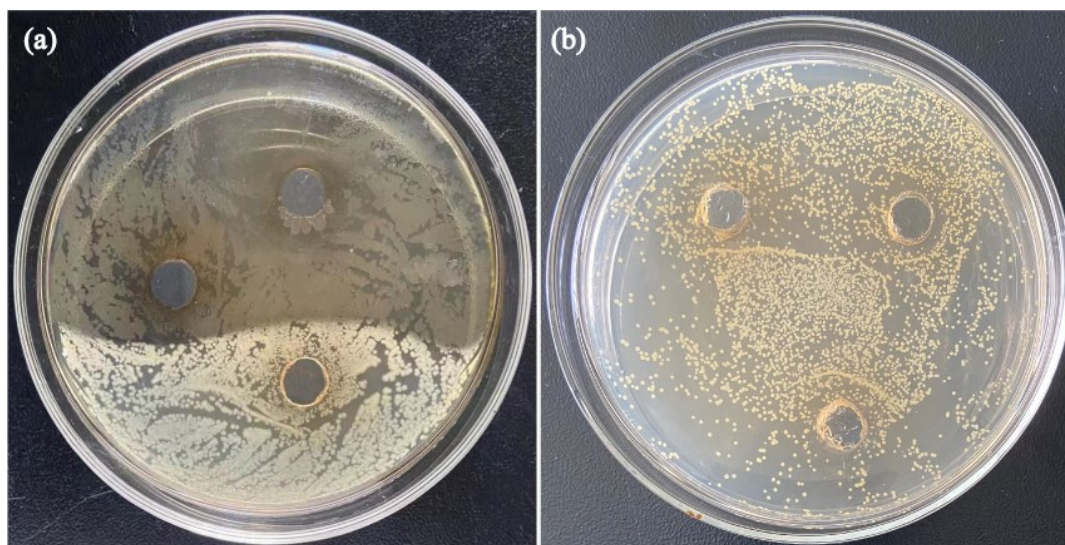

**Fig. S2.** Antibacterial activity: (a) *E. coli* treated by DMY; (b) *S. aureus* treated by

DMY

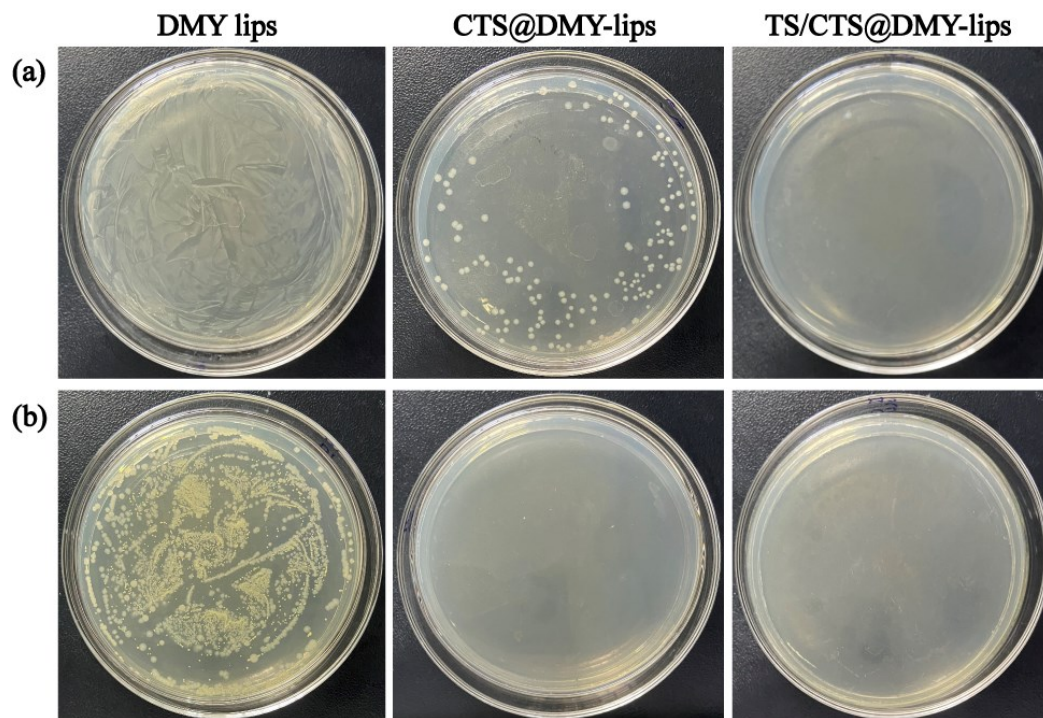

**Fig. S3.** Representative images of (a) *E. coli* and (b) *S. aureus* colonies cultured after treatment with the different drugs for 24 h
